# Supplementary material
Source: Springer Nature journal article supplement (https://www.springermedizin.de/resource/supplementary/12889_2007_982_MOESM2_ESM.pdf/9502430)
Supplement: MOESM2 [file 9502430]

within 1 week  
after randomisation.

Consult OP.

Step 1

RTW coordinator contacts employee and supervisor.  
→ *Organizational preparation.*

Step 2, 3 & 4:  
within 2 weeks  
after consult OP.

Meeting RTW coordinator and  
employee.  
→ *Inventory of barriers for  
RTW.*

Meeting RTW coordinator and  
supervisor.  
→ *Inventory of barriers for  
RTW.*

Meeting employee, supervisor and RTW coordinator.  
→ *Thinking of solutions.*  
→ *Preparation of the implementation.*

Step 5

Instruction for employee at work.  
→ *Implementing solutions.*

Step 6 & 7:  
4 weeks  
after  
meetings.

Contact with employee and supervisor by phone.  
→ *Evaluation and control.*

Follow-up OP
